# Supplementary material for: Photothermal catalytic activity of combustion synthesized LaCoxFe1−xO3 (0 ≤ x ≤ 1) perovskite for CO2 reduction with H2O to CH4 and CH3OH
Source: Royal Society of Chemistry journal article supplement (doi:10.1039/c7ra04879c), 2017-01-01

## Supporting Information

### Photothermal catalytic activity of combustion synthesized $\text{LaCo}_x\text{Fe}_{1-x}\text{O}_3$ ( $0 \leq x \leq 1$ ) perovskite for $\text{CO}_2$ reduction with $\text{H}_2\text{O}$ to $\text{CH}_4$ and $\text{CH}_3\text{OH}$

Lijuan Xu<sup>a</sup>, Minh Ngoc Ha<sup>c</sup>, Qiangsheng Guo<sup>b</sup>, Lichao Wang<sup>a</sup>, Yanan Ren<sup>a</sup>, Na Sha<sup>\*b</sup>, Zhe Zhao<sup>\*ad</sup>

#### S1. Experimental information

##### Preparation of catalysts

$\text{La}(\text{NO}_3)_3 \cdot 6\text{H}_2\text{O}$ ,  $\text{Fe}(\text{NO}_3)_3 \cdot 9\text{H}_2\text{O}$ ,  $\text{Co}(\text{NO}_3)_2 \cdot 6\text{H}_2\text{O}$ , and citric acid were procured from Shanghai Titan chemicals Co., Ltd. These chemicals as raw material were directly used to compound series  $\text{LaCo}_x\text{Fe}_{1-x}\text{O}_3$  mixed-oxide perovskites, which was without any further purification treatment.

In a typical experiment, the catalyst in accordance with the formula  $\text{LaCo}_x\text{Fe}_{1-x}\text{O}_3$  ( $x=0, 0.2, 0.4, 0.6, 0.8$  and  $1$ ) were synthesized via a modified sol-gel combustion route. The metal nitrates of  $\text{La}(\text{NO}_3)_3 \cdot 6\text{H}_2\text{O}$ ,  $\text{Fe}(\text{NO}_3)_3 \cdot 9\text{H}_2\text{O}$  and  $\text{Co}(\text{NO}_3)_2 \cdot 6\text{H}_2\text{O}$  were mixed together in an aqueous solution and until the formation of a clear solution, then citric acid was added into the mixed solution under constant stirring, the molar ratio between the total amount of nitrates and the acid was 1:1.2. The resulting solution were then heated at  $80^\circ\text{C}$  until a sol formation, then the sol completely dried overnight at  $120^\circ\text{C}$  in a oven. After that, these materials were calcined in air at  $500, 600, 700, 800, 900^\circ\text{C}$  for 2h, heating rate of  $5^\circ\text{C} \cdot \text{min}^{-1}$ , to obtain perovskite type nanoparticles.

##### Characterization

The synthesized samples were characterized using X-ray diffraction (PAN alytical X'pert), their crystalline phases were determined by Cu K $\alpha$  radiation ( $\lambda = 0.154\text{nm}$ ) at 40 kV and 40 mA. The XRD patterns were record in the range between  $10^\circ$  and  $80^\circ$  at the scan rate of  $10^\circ \text{ min}^{-1}$ . The morphologies and sizes of the products were determined by Scanning Electron Microscopy (SEM, JSM-7000F). TEM images of samples were obtained using a FEI TECNAI G2F20 transmission electron microscopy with a beam energy at 300 kV voltage. BET specific surface areas of the samples were performed by using a Micrometetics USA ASAP2020 instrument with adsorption-desorption of  $\text{N}_2$  at 77K, samples were degassed 2h at  $150^\circ\text{C}$ . The UV-Vis diffuse reflectance spectrum of all the samples were obtained by using a UV-Vis spectrophotometer (SHIMADZU UV-3600, Japan) with  $\text{BaSO}_4$  as the reflectance standard. The element composition and distribution was measure by using an energy dispersive X-ray spectromemeter (EDS) detector attached to the SEM (S-3400N, Hitachi) with a Bruker-AXS 133 eV XFlash 4010 Detector. X-ray photoelectron spectroscopy (XPS) was characterized by an ESCALAB 250 instrument with Al K $\alpha$  ( $h\nu=1486.6\text{eV}$ ) source at a residual gas pressure of below  $10^{-10}$  Pa. Mott-Schottky curves were measured using a three-electrode system on the CHI604E

electrochemistry workstation.

## Catalytic measurements

The photothermal catalytic reduction of CO<sub>2</sub> was carried out with 100 mg of the sample powdered, which was uniformly placed at the bottom of a Pyrex glass cell. The whole catalysis reaction temperature was set at 350°C with visible light irradiation on (photothermal). The temperature control was realized by a heating jacket surrounded the quartz reactor. And the light source used was a 300 W Xe lamp equipped with a UV- light filter ( $\lambda > 420\text{nm}$ ). The light illumination intensity is measured using CEL-NP2000-2 Full Spectral Optical Power Meter. And the measured optical power density value is 145 mW/cm<sup>2</sup>. Before the reaction, the reactor was vacuumed with a pump and then was filled with high purity CO<sub>2</sub> (99.999 wt %) at a flow rate of 27 mL/min for 5min. This process was repeated for 5 times in order to guarantee that no other possible impurity gases will be involved during the catalytic reaction. The catalytic experiments were carried out in a gas-tight circulation system, distilled water (0.3 mL) was injected into the system when the temperature was higher than 120°C. The catalytic performance characterization was started once the reactor reached 350°C. The light source will be only switched on the time reactor reached 350°C. Samples were then taken hourly and qualitatively analyzed by GS-Tek (Echromtek A90) with gas chromatograph equipped with a flame ionization detector (FID). Finally, the quantification of CH<sub>4</sub> and CH<sub>3</sub>OH yield was based on calibration curve method.

## S2. The studies of catalytic properties assessment about Yield and STM efficiency of the photothermal catalysis

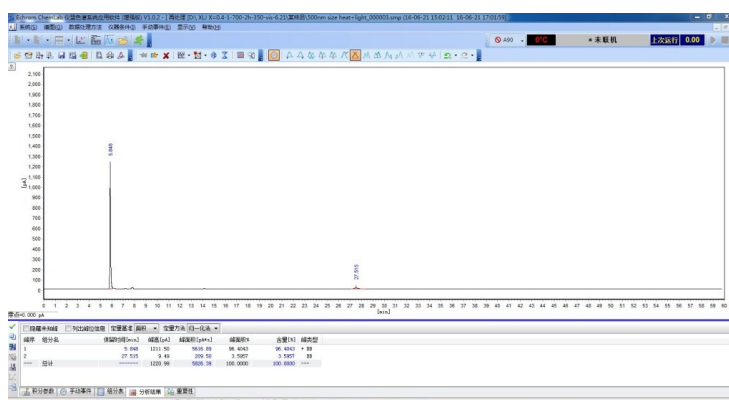

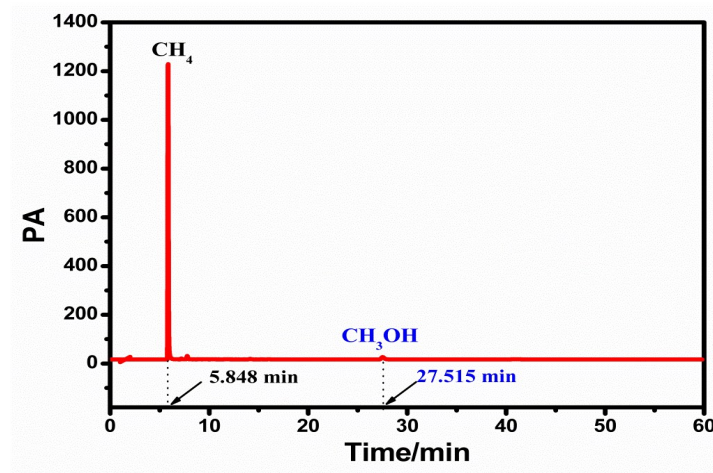

Figure S2. The original GC data

#### Energy efficiency discussion

A 300 W high-pressure Xe lamp (CEL-HXUV300, spectral output 420-760nm, overall radiant output 50 W) was used as the light source and the distance from a point source of light to the catalyst surface is 10 cm. The power of incident light was obtained by a CEL-NP2000 (Beijing CEAL Light, China). Solar-to-Methane (or Methanol) (STM) energy conversion efficiency was estimated using the following equation:

$$STM \text{ efficiency } (\%) = \frac{\text{Methane (mol)}(\text{Or Methanol(mol)}) \times \Delta G^\circ (kJ \cdot mol^{-1})}{P_{total} (W \cdot cm^{-2}) \times \text{Electrode area } (cm^2)}$$

Where  $\Delta G^\circ$  is the Gibbs free energy for conversion of gaseous  $CO_2$  to Methane (or Methanol) ( $801 \text{ kJ} \cdot \text{mol}^{-1}$ ,  $690 \text{ kJ} \cdot \text{mol}^{-1}$ ), Electrode area ( $4 \text{ cm}^2$ ) and  $P_{total}$  is the power of incident light ( $145 \text{ mW} \cdot \text{cm}^{-2}$ ).  $\Delta G^\circ$  was estimated based on the following chemical reaction:

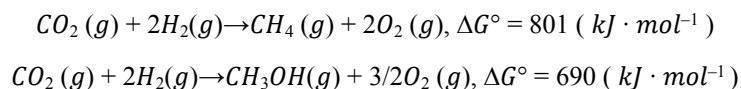

The yield of Calculation:

For example:  $CO_2$ :  $V(\text{input})=130\text{ml}$ ,  $n=130\text{ml}/22.4\text{mol}=5803.5714 \mu\text{mol}$ ;

Reactor volume=210ml

The quantification of  $CH_4$  and  $CH_3OH$  yield was based on the external standard and the use of calibration curve. The average area of  $CH_4$  (100%) is 756900 ( $V=0.1\text{ml}$ ), the average area of  $CH_3OH$  (100%) is 13093 ( $V=0.1\mu\text{l} \times (1\text{ml}/11\text{ml})/1000(\text{ml})$ , 1ml of methanol and mixed 10ml  $H_2O$  extracting the mixture 0.1 $\mu\text{l}$ ). At the same conditions, the average area of  $CH_4$  and  $CH_3OH$  evolved from  $LaCo_{0.6}Fe_{0.4}O_3$  is 3530.4 and 203.67 under photothermal catalytic conditions after 6h (Every time, the volume of taking samples injected into the system is  $V=0.5\text{ml}$  (The volume of gas is mingle gas volume.)). The total volume of  $CH_4$  (100%) and  $CH_3OH$  (100%) evolved from  $LaCo_{0.6}Fe_{0.4}O_3$  is 9.795 and 0.308  $\mu\text{l}$  under photothermal catalytic conditions through mathematical and computation.

**Yield (Moles of product  $CH_4$  or  $CH_3OH$  per 100 moles of carbon dioxide)**

$$=97.95\mu\text{l}/22.4/5803.5714*100=7.53459\% \text{ (or } 3.08\mu\text{l}/22.4/5803.5714*100=0.23688\%)$$

**Table. S2** The yield and STM efficiency of photothermal reduction of CO<sub>2</sub> with H<sub>2</sub>O vapor to CH<sub>4</sub> and CH<sub>3</sub>OH over LaCo<sub>x</sub>Fe<sub>1-x</sub>O<sub>3</sub> catalyst

| Sample(x) | Yield <sup>[a]</sup> (%) |                    | STM efficiency (%) |                    | Selectivity(%)  |                    | Total Yield (%) |
|-----------|--------------------------|--------------------|--------------------|--------------------|-----------------|--------------------|-----------------|
|           | CH <sub>4</sub>          | CH <sub>3</sub> OH | CH <sub>4</sub>    | CH <sub>3</sub> OH | CH <sub>4</sub> | CH <sub>3</sub> OH |                 |
| 0.0       | 2.39                     | 0.06               | 0.19               | 0.005              | 97.57           | 2.43               | 2.45            |
| 0.2       | 5.56                     | 0.16               | 0.44               | 0.013              | 97.11           | 2.89               | 5.72            |
| 0.4       | 6.12                     | 0.22               | 0.49               | 0.018              | 96.47           | 3.53               | 6.34            |
| 0.6       | 7.53                     | 0.24               | 0.60               | 0.019              | 96.95           | 3.05               | 7.77            |
| 0.8       | 3.87                     | 0.09               | 0.31               | 0.007              | 97.35           | 2.65               | 3.96            |
| 1.0       | 3.34                     | 0.08               | 0.26               | 0.006              | 97.94           | 2.06               | 3.42            |

[a] Moles of product (CH<sub>4</sub> or CH<sub>3</sub>OH) per 100 moles of CO<sub>2</sub>.

References

- 1 J. H. Wang, Y. Li, Z. S. Zhang and Z. P. Hao, J. Mater. Chem. A, 2015, 3, 8650.
- 2 X. Z. Cui, J. L. Shi, H. R. Chen, L. X. Zhang and L. M. Guo, J. Phys. Chem. B, 2008, 112, 12024.
- 3 J. Tauc, A. Menth, J. Non-Cryst. Solids., 1972, 569, 8-10

### S3. Reaction molecular formula

**Thermal-catalysis:**

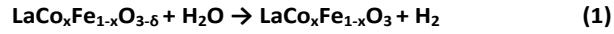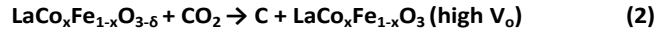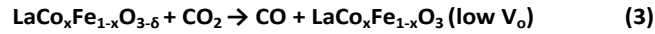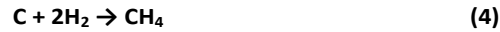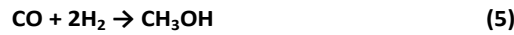

**Photo-catalysis:**

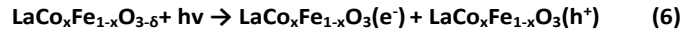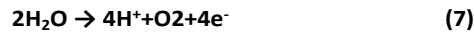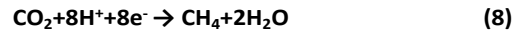

**Photothermal catalysis:**

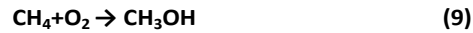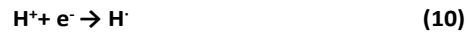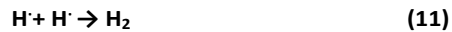

**The total reaction under Photothermal:**

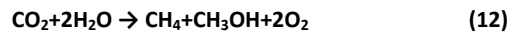

Supplement: c7ra04879c1.pdf [file c7ra04879c1.pdf]
